# Supplementary material for: Organizational Factors Moderating Changes in Tobacco Use Dependence Care Delivery Following a Comprehensive Tobacco-Free Workplace Intervention in Non-Profit Substance Use Treatment Centers
Source: MDPI journal article supplement (doi:10.3390/ijerph181910485), 2021-10-06
Supplement: s1 [file s1]

**Supplementary Table S1.** Change in Clinician Screening and Treatment Behaviors Pre- to Post-Program Implementation by Substance Use Treatment Center (SUTC).

| Clinician Behaviors  | Pre-Implementation N | Pre Yes (%) | Post-Implementation N | Post Yes (%) | p-Value |
|----------------------|----------------------|-------------|-----------------------|--------------|---------|
| <b><u>Ask</u></b>    |                      |             |                       |              |         |
| <i>All SUTCs</i>     | 259                  | 66.25       | 194                   | 77.84        | 0.0036  |
| SUTC 1               | 11                   | 45.45       | 3                     | 100.00       | 0.2088  |
| SUTC 2               | 65                   | 43.08       | 50                    | 70.00        | 0.0040  |
| SUTC 3               | 6                    | 100.00      | 4                     | 100.00       | NA      |
| SUTC 4               | 23                   | 91.30       | 19                    | 89.47        | 1.0000  |
| SUTC 5               | 30                   | 83.33       | 14                    | 100.00       | 0.1607  |
| SUTC 6               | 25                   | 76.00       | 22                    | 81.82        | 0.7298  |
| SUTC 7               | 11                   | 63.64       | 13                    | 92.31        | 0.1421  |
| SUTC 8               | 9                    | 88.89       | 7                     | 100.00       | 1.0000  |
| SUTC 9               | 3                    | 100.00      | 2                     | 100.00       | NA      |
| SUTC 10              | 3                    | 66.67       | 4                     | 100.00       | 0.4286  |
| SUTC 11              | 3                    | 66.67       | 2                     | 100.00       | 1.0000  |
| SUTC 12              | 8                    | 100.00      | 1                     | 100.00       | NA      |
| SUTC 13              | 50                   | 52.00       | 40                    | 52.50        | 0.9624  |
| SUTC 14              | 3                    | 100.00      | 5                     | 80.00        | 1.0000  |
| SUTC 15              | 9                    | 66.67       | 8                     | 87.50        | 0.5765  |
| <b><u>Advise</u></b> |                      |             |                       |              |         |
| <i>All SUTCs</i>     | 223                  | 60.54       | 181                   | 71.82        | 0.0176  |
| SUTC 1               | 9                    | 44.44       | 3                     | 100.00       | 0.2045  |
| SUTC 2               | 59                   | 49.15       | 49                    | 61.22        | 0.2096  |
| SUTC 3               | 6                    | 66.67       | 4                     | 100.00       | 0.4667  |
| SUTC 4               | 19                   | 68.42       | 14                    | 71.43        | 1.0000  |
| SUTC 5               | 26                   | 76.92       | 14                    | 78.57        | 1.0000  |
| SUTC 6               | 24                   | 58.33       | 20                    | 80.00        | 0.1244  |
| SUTC 7               | 11                   | 72.73       | 12                    | 100.00       | 0.0932  |
| SUTC 8               | 8                    | 50.00       | 7                     | 71.43        | 0.6084  |
| SUTC 9               | 3                    | 100.00      | 2                     | 100.00       | NA      |
| SUTC 10              | 3                    | 66.67       | 4                     | 100.00       | 0.4286  |
| SUTC 11              | 3                    | 100.00      | 2                     | 100.00       | NA      |
| SUTC 12              | 7                    | 85.71       | 1                     | 100.00       | 1.0000  |
| SUTC 13              | 34                   | 41.18       | 36                    | 50.00        | 0.4589  |
| SUTC 14              | 3                    | 100.00      | 5                     | 80.00        | 0.4076  |
| SUTC 15              | 8                    | 100.00      | 8                     | 100.00       | NA      |
| <b><u>Assess</u></b> |                      |             |                       |              |         |
| <i>All SUTCs</i>     | 224                  | 70.98       | 184                   | 78.80        | 0.0712  |
| SUTC 1               | 9                    | 55.56       | 3                     | 100.00       | 0.4909  |
| SUTC 2               | 59                   | 49.15       | 48                    | 72.92        | 0.0126  |
| SUTC 3               | 6                    | 83.33       | 4                     | 100.00       | 1.0000  |
| SUTC 4               | 20                   | 95.00       | 17                    | 94.12        | 1.0000  |
| SUTC 5               | 26                   | 96.15       | 13                    | 92.31        | 1.0000  |
| SUTC 6               | 24                   | 83.33       | 21                    | 76.19        | 0.7129  |
| SUTC 7               | 11                   | 63.64       | 13                    | 84.62        | 0.3572  |
| SUTC 8               | 8                    | 87.50       | 7                     | 100.00       | 1.0000  |
| SUTC 9               | 3                    | 100.00      | 2                     | 100.00       | NA      |
| SUTC 10              | 3                    | 100.00      | 4                     | 100.00       | NA      |
| SUTC 11              | 3                    | 33.00       | 2                     | 100.00       | 0.4000  |
| SUTC 12              | 7                    | 100.00      | 1                     | 100.00       | NA      |

|                       |     |        |     |        |         |
|-----------------------|-----|--------|-----|--------|---------|
| SUTC 13               | 34  | 50.00  | 36  | 61.11  | 0.3496  |
| SUTC 14               | 3   | 100.00 | 5   | 60.00  | 0.4643  |
| SUTC 15               | 8   | 100.00 | 8   | 87.50  | 1.0000  |
| <b><u>Assist</u></b>  |     |        |     |        |         |
| All SUTCs             | 222 | 45.95  | 181 | 69.61  | <0.0001 |
| SUTC 1                | 9   | 33.33  | 3   | 100.00 | 0.1818  |
| SUTC 2                | 60  | 30.00  | 49  | 65.31  | 0.0002  |
| SUTC 3                | 6   | 83.33  | 4   | 100.00 | 1.0000  |
| SUTC 4                | 19  | 42.11  | 14  | 57.14  | 0.3930  |
| SUTC 5                | 26  | 84.62  | 14  | 85.71  | 1.0000  |
| SUTC 6                | 23  | 56.52  | 20  | 85.00  | 0.0425  |
| SUTC 7                | 11  | 36.36  | 13  | 69.23  | 0.1074  |
| SUTC 8                | 7   | 57.14  | 7   | 71.43  | 1.0000  |
| SUTC 9                | 3   | 100.00 | 2   | 100.00 | NA      |
| SUTC 10               | 3   | 0.00   | 4   | 75.00  | 0.1429  |
| SUTC 11               | 3   | 66.67  | 2   | 100.00 | 1.0000  |
| SUTC 12               | 7   | 57.14  | 1   | 100.00 | 1.0000  |
| SUTC 13               | 34  | 29.41  | 35  | 51.43  | 0.0626  |
| SUTC 14               | 3   | 100.00 | 5   | 60.00  | 0.4643  |
| SUTC 15               | 8   | 37.50  | 8   | 87.50  | 0.1189  |
| <b><u>Arrange</u></b> |     |        |     |        |         |
| All SUTCs             | 222 | 35.14  | 182 | 59.89  | <0.0001 |
| SUTC 1                | 9   | 22.22  | 3   | 66.67  | 0.2364  |
| SUTC 2                | 59  | 23.73  | 50  | 52.00  | 0.0023  |
| SUTC 3                | 6   | 50.00  | 4   | 75.00  | 0.5714  |
| SUTC 4                | 19  | 36.84  | 14  | 71.43  | 0.0799  |
| SUTC 5                | 26  | 65.38  | 14  | 57.14  | 0.6070  |
| SUTC 6                | 24  | 41.67  | 20  | 70.00  | 0.0755  |
| SUTC 7                | 11  | 45.45  | 13  | 61.54  | 0.4307  |
| SUTC 8                | 7   | 0.00   | 7   | 57.14  | 0.0699  |
| SUTC 9                | 3   | 100.00 | 2   | 100.00 | NA      |
| SUTC 10               | 3   | 66.67  | 4   | 75.00  | 1.0000  |
| SUTC 11               | 3   | 33.33  | 2   | 100.00 | 0.4000  |
| SUTC 12               | 7   | 71.43  | 1   | 100.00 | 1.0000  |
| SUTC 13               | 34  | 11.76  | 36  | 44.44  | 0.0025  |
| SUTC 14               | 3   | 100.00 | 5   | 80.00  | 1.0000  |
| SUTC 15               | 8   | 25.00  | 7   | 85.71  | 0.0406  |

Note. Chi-square tests/Fisher exact tests were conducted, as appropriate, to examine pre- to post-implementation changes in the 5 A's.

**Supplementary Table S2.** Adjusted Model of Organizational Demographics as Moderators of Clinician Screening and Treatment Behaviors Pre- to Post-Program Implementation.

| Clinician Behaviors | Number of total annual patient visits      |          |       |       |
|---------------------|--------------------------------------------|----------|-------|-------|
|                     | Effect                                     | Estimate | SE    | p     |
| Ask                 | Time (ref: pre-implementation)             | 1.079    | 0.324 | 0.001 |
|                     | Number of total annual patient visits      | 0.219    | 0.486 | 0.652 |
|                     | Time*Number of total annual patient visits | -0.707   | 0.467 | 0.130 |
|                     | ORIC overall                               | 1.766    | 1.916 | 0.357 |
|                     | Number of unique annual patient visits     | 0.663    | 0.733 | 0.366 |
|                     | Number of full-time employees              | -1.978   | 0.700 | 0.005 |
| Advise              | Time (ref: pre-implementation)             | 0.780    | 0.309 | 0.012 |
|                     | Number of total annual patient visits      | -0.211   | 0.465 | 0.651 |
|                     | Time*Number of total annual patient visits | -0.329   | 0.457 | 0.471 |

|                                               |                                             |                 |           |          |
|-----------------------------------------------|---------------------------------------------|-----------------|-----------|----------|
|                                               | ORIC overall                                | 3.437           | 1.650     | 0.038    |
|                                               | Number of unique annual patient visits      | 0.292           | 0.716     | 0.684    |
|                                               | Number of full-time employees               | -0.763          | 0.611     | 0.212    |
| Assess                                        | Time (ref: pre-implementation)              | 0.823           | 0.335     | 0.015    |
|                                               | Number of total annual patient visits       | 0.462           | 0.602     | 0.443    |
|                                               | Time*Number of total annual patient visits  | -0.601          | 0.506     | 0.236    |
|                                               | ORIC overall                                | -0.004          | 2.275     | 0.999    |
|                                               | Number of unique annual patient visits      | 0.336           | 0.919     | 0.715    |
|                                               | Number of full-time employees               | -1.529          | 0.842     | 0.070    |
| Assist                                        | Time (ref: pre-implementation)              | 1.515           | 0.314     | <0.001   |
|                                               | Number of total annual patient visits       | -0.260          | 0.354     | 0.463    |
|                                               | Time*Number of total annual patient visits  | -0.694          | 0.450     | 0.124    |
|                                               | ORIC overall                                | 2.393           | 1.287     | 0.064    |
|                                               | Number of unique annual patient visits      | -0.022          | 0.579     | 0.970    |
|                                               | Number of full-time employees               | -1.098          | 0.502     | 0.029    |
| Arrange                                       | Time (ref: pre-implementation)              | 1.468           | 0.304     | <0.001   |
|                                               | Number of total annual patient visits       | 0.116           | 0.321     | 0.719    |
|                                               | Time*Number of total annual patient visits  | -0.555          | 0.438     | 0.206    |
|                                               | ORIC overall                                | 3.974           | 1.272     | 0.002    |
|                                               | Number of unique annual patient visits      | 0.069           | 0.589     | 0.906    |
|                                               | Number of full-time employees               | -0.605          | 0.507     | 0.233    |
| <b>Number of unique annual patient visits</b> |                                             |                 |           |          |
|                                               | <b>Effect</b>                               | <b>Estimate</b> | <b>SE</b> | <b>p</b> |
| Ask                                           | Time (ref: pre-implementation)              | 2.097           | 1.100     | 0.057    |
|                                               | Number of unique annual patient visits      | 0.967           | 0.761     | 0.204    |
|                                               | Time*Number of unique annual patient visits | -1.449          | 1.126     | 0.199    |
|                                               | ORIC overall                                | 1.967           | 1.939     | 0.311    |
|                                               | Number of total annual patient visits       | -0.040          | 0.455     | 0.929    |
|                                               | Number of full-time employees               | -2.005          | 0.704     | 0.005    |
| Advise                                        | Time (ref: pre-implementation)              | 0.924           | 0.631     | 0.144    |
|                                               | Number of unique annual patient visits      | 0.413           | 0.738     | 0.576    |
|                                               | Time*Number of unique annual patient visits | -0.340          | 0.677     | 0.616    |
|                                               | ORIC overall                                | 3.503           | 1.650     | 0.034    |
|                                               | Number of total annual patient visits       | -0.347          | 0.427     | 0.417    |
|                                               | Number of full-time employees               | -0.782          | 0.609     | 0.200    |
| Assess                                        | Time (ref: pre-implementation)              | 0.434           | 0.760     | 0.569    |
|                                               | Number of unique annual patient visits      | 0.329           | 0.947     | 0.728    |
|                                               | Time*Number of unique annual patient visits | 0.148           | 0.804     | 0.854    |
|                                               | ORIC overall                                | 0.074           | 2.294     | 0.974    |
|                                               | Number of total annual patient visits       | 0.227           | 0.573     | 0.692    |
|                                               | Number of full-time employees               | -1.566          | 0.848     | 0.065    |
| Assist                                        | Time (ref: pre-implementation)              | 0.926           | 0.580     | 0.111    |
|                                               | Number of unique annual patient visits      | -0.063          | 0.590     | 0.915    |
|                                               | Time*Number of unique annual patient visits | 0.309           | 0.628     | 0.622    |
|                                               | ORIC overall                                | 2.549           | 1.259     | 0.044    |
|                                               | Number of total annual patient visits       | -0.553          | 0.294     | 0.061    |
|                                               | Number of full-time employees               | -1.173          | 0.487     | 0.017    |
| Arrange                                       | Time (ref: pre-implementation)              | 0.479           | 0.480     | 0.319    |
|                                               | Number of unique annual patient visits      | -0.219          | 0.603     | 0.717    |
|                                               | Time*Number of unique annual patient visits | 0.914           | 0.541     | 0.092    |
|                                               | ORIC overall                                | 4.036           | 1.256     | 0.001    |
|                                               | Number of total annual patient visits       | -0.158          | 0.248     | 0.524    |

|         |                                        |                 |           |          |
|---------|----------------------------------------|-----------------|-----------|----------|
|         | Number of full-time employees          | -0.663          | 0.493     | 0.179    |
|         | <b>Number of full-time employees</b>   |                 |           |          |
|         | <b>Effect</b>                          | <b>Estimate</b> | <b>SE</b> | <b>p</b> |
| Ask     | Time (ref: pre-implementation)         | 1.740           | 1.090     | 0.111    |
|         | Number of full-time employees          | -1.794          | 0.716     | 0.013    |
|         | Time*Number of full-time employees     | -1.058          | 1.116     | 0.344    |
|         | ORIC overall                           | 2.015           | 1.929     | 0.297    |
|         | Number of total annual patient visits  | -0.037          | 0.452     | 0.935    |
|         | Number of unique annual patient visits | 0.714           | 0.727     | 0.326    |
| Advise  | Time (ref: pre-implementation)         | 0.672           | 0.570     | 0.239    |
|         | Number of full-time employees          | -0.776          | 0.645     | 0.229    |
|         | Time*Number of full-time employees     | -0.050          | 0.622     | 0.936    |
|         | ORIC overall                           | 3.535           | 1.652     | 0.033    |
|         | Number of total annual patient visits  | -0.345          | 0.426     | 0.418    |
|         | Number of unique annual patient visits | 0.326           | 0.713     | 0.648    |
| Assess  | Time (ref: pre-implementation)         | 0.169           | 0.785     | 0.830    |
|         | Number of full-time employees          | -1.715          | 0.904     | 0.058    |
|         | Time*Number of full-time employees     | 0.439           | 0.827     | 0.596    |
|         | ORIC overall                           | 0.044           | 2.279     | 0.985    |
|         | Number of total annual patient visits  | 0.223           | 0.571     | 0.696    |
|         | Number of unique annual patient visits | 0.365           | 0.923     | 0.693    |
| Assist  | Time (ref: pre-implementation)         | 0.585           | 0.533     | 0.273    |
|         | Number of full-time employees          | -1.421          | 0.534     | 0.008    |
|         | Time*Number of full-time employees     | 0.725           | 0.586     | 0.217    |
|         | ORIC overall                           | 2.393           | 1.259     | 0.058    |
|         | Number of unique annual patient visits | 0.017           | 0.568     | 0.976    |
|         | Number of total annual patient visits  | -0.566          | 0.295     | 0.056    |
| Arrange | Time (ref: pre-implementation)         | 0.703           | 0.485     | 0.148    |
|         | Number of full-time employees          | -0.946          | 0.552     | 0.087    |
|         | Time*Number of full-time employees     | 0.634           | 0.546     | 0.246    |
|         | ORIC overall                           | 3.828           | 1.281     | 0.003    |
|         | Number of unique annual patient visits | 0.122           | 0.588     | 0.835    |
|         | Number of total annual patient visits  | -0.164          | 0.250     | 0.512    |

Note. Generalized linear mixed models were conducted to examine the moderation effect of organizational demographics on clinician screening and treatment behaviors from pre- and post-program implementation. ORIC=Organizational Readiness for Implementing Change. \*=multiplication operator to indicate the interaction term. Ref=reference group in analyses. The number of total annual patient visits, number of total unique patient visits, and number of full-time employees were median-split.

**Supplementary Table S3.** Adjusted Model of Organizational Readiness for Change Subscales as Moderators of Clinician Screening and Treatment Behaviors Pre- to Post-Program Implementation.

| Clinician Behaviors | Effect                                 | ORIC Change Efficacy |       |       |
|---------------------|----------------------------------------|----------------------|-------|-------|
|                     |                                        | Estimate             | SE    | p     |
| Ask                 | Time (ref: pre-implementation)         | 0.815                | 0.239 | 0.001 |
|                     | ORIC subscale                          | 0.023                | 0.949 | 0.981 |
|                     | ORIC subscale*time                     | 1.638                | 0.728 | 0.025 |
|                     | Number of total annual patient visits  | 0.156                | 0.459 | 0.734 |
|                     | Number of unique annual patient visits | 0.643                | 0.802 | 0.423 |
|                     | Number of full-time employees          | -2.156               | 0.756 | 0.005 |
|                     |                                        |                      |       |       |
| Advise              | Time (ref: pre-implementation)         | 0.639                | 0.230 | 0.006 |
|                     | ORIC subscale                          | 1.924                | 0.894 | 0.032 |
|                     | ORIC subscale*time                     | 0.272                | 0.702 | 0.698 |

|                     | Number of total annual patient visits  | 0.119    | 0.398 | 0.766  |
|---------------------|----------------------------------------|----------|-------|--------|
|                     | Number of unique annual patient visits | 0.707    | 0.771 | 0.360  |
|                     | Number of full-time employees          | -1.255   | 0.657 | 0.057  |
| Assess              | Time (ref: pre-implementation)         | 0.569    | 0.252 | 0.024  |
|                     | ORIC subscale                          | 0.695    | 1.135 | 0.541  |
|                     | ORIC subscale*time                     | 0.440    | 0.784 | 0.574  |
|                     | Number of total annual patient visits  | 0.298    | 0.534 | 0.577  |
|                     | Number of unique annual patient visits | 0.774    | 0.968 | 0.424  |
|                     | Number of full-time employees          | -1.816   | 0.875 | 0.039  |
|                     |                                        |          |       |        |
| Assist              | Time (ref: pre-implementation)         | 1.190    | 0.227 | <0.001 |
|                     | ORIC subscale                          | 0.102    | 0.711 | 0.886  |
|                     | ORIC subscale*time                     | 0.705    | 0.722 | 0.329  |
|                     | Number of total annual patient visits  | -0.379   | 0.317 | 0.233  |
|                     | Number of unique annual patient visits | -0.365   | 0.641 | 0.570  |
|                     | Number of full-time employees          | -1.050   | 0.557 | 0.060  |
|                     |                                        |          |       |        |
| Arrange             | Time (ref: pre-implementation)         | 1.260    | 0.229 | <0.001 |
|                     | ORIC subscale                          | 2.287    | 0.843 | 0.007  |
|                     | ORIC subscale*time                     | -1.292   | 0.808 | 0.110  |
|                     | Number of total annual patient visits  | 0.268    | 0.303 | 0.377  |
|                     | Number of unique annual patient visits | 0.087    | 0.637 | 0.891  |
|                     | Number of full-time employees          | -0.870   | 0.567 | 0.126  |
|                     |                                        |          |       |        |
| Clinician Behaviors | ORIC Change Commitment                 |          |       |        |
|                     | Effect                                 | Estimate | SE    | p      |
| Ask                 | Time (ref: pre-implementation)         | 0.719    | 0.245 | 0.004  |
|                     | ORIC subscale                          | 2.918    | 0.650 | <0.001 |
|                     | ORIC subscale*time                     | -0.115   | 0.707 | 0.871  |
|                     | Number of total annual patient visits  | -1.069   | 0.328 | 0.001  |
|                     | Number of unique annual patient visits | 2.477    | 0.714 | 0.001  |
|                     | Number of full-time employees          | -3.080   | 0.656 | <0.001 |
|                     |                                        |          |       |        |
| Advise              | Time (ref: pre-implementation)         | 0.677    | 0.236 | 0.004  |
|                     | ORIC subscale                          | 2.124    | 0.603 | <0.001 |
|                     | ORIC subscale*time                     | 0.564    | 0.656 | 0.391  |
|                     | Number of total annual patient visits  | -1.018   | 0.314 | 0.001  |
|                     | Number of unique annual patient visits | 0.905    | 0.623 | 0.147  |
|                     | Number of full-time employees          | -1.096   | 0.506 | 0.031  |
|                     |                                        |          |       |        |
| Assess              | Time (ref: pre-implementation)         | 0.491    | 0.261 | 0.060  |
|                     | ORIC subscale                          | 1.720    | 1.203 | 0.154  |
|                     | ORIC subscale*time                     | -0.581   | 0.717 | 0.418  |
|                     | Number of total annual patient visits  | -0.302   | 0.646 | 0.640  |
|                     | Number of unique annual patient visits | 1.412    | 1.067 | 0.187  |
|                     | Number of full-time employees          | -2.029   | 0.845 | 0.017  |
|                     |                                        |          |       |        |
| Assist              | Time (ref: pre-implementation)         | 1.158    | 0.226 | <0.001 |
|                     | ORIC subscale                          | 1.257    | 0.581 | 0.031  |
|                     | ORIC subscale*time                     | -0.347   | 0.617 | 0.574  |
|                     | Number of total annual patient visits  | -0.813   | 0.305 | 0.008  |
|                     | Number of unique annual patient visits | 0.197    | 0.597 | 0.742  |
|                     | Number of full-time employees          | -1.324   | 0.503 | 0.009  |
|                     |                                        |          |       |        |
| Arrange             | Time (ref: pre-implementation)         | 1.177    | 0.220 | <0.001 |
|                     | ORIC subscale                          | 1.761    | 0.586 | 0.003  |
|                     | ORIC subscale*time                     | -0.698   | 0.594 | 0.241  |
|                     | Number of total annual patient visits  | -0.525   | 0.288 | 0.069  |
|                     | Number of unique annual patient visits | 0.140    | 0.561 | 0.803  |

|                     | Number of full-time employees          | -0.717                     | 0.459 | 0.119  |
|---------------------|----------------------------------------|----------------------------|-------|--------|
| Clinician Behaviors | Effect                                 | ORIC Task Knowledge        |       |        |
|                     |                                        | Estimate                   | SE    | p      |
| Ask                 | Time (ref: pre-implementation)         | 0.802                      | 0.244 | 0.001  |
|                     | ORIC subscale                          | -1.021                     | 0.349 | 0.004  |
|                     | ORIC subscale*time                     | -0.658                     | 0.605 | 0.278  |
|                     | Number of total annual patient visits  | 0.108                      | 0.227 | 0.635  |
|                     | Number of unique annual patient visits | 0.414                      | 0.534 | 0.438  |
|                     | Number of full-time employees          | -2.261                     | 0.614 | <0.001 |
| Advise              | Time (ref: pre-implementation)         | 0.689                      | 0.234 | 0.004  |
|                     | ORIC subscale                          | -0.087                     | 0.520 | 0.868  |
|                     | ORIC subscale*time                     | -1.096                     | 0.563 | 0.052  |
|                     | Number of total annual patient visits  | -0.024                     | 0.378 | 0.949  |
|                     | Number of unique annual patient visits | -0.662                     | 0.590 | 0.263  |
|                     | Number of full-time employees          | -0.400                     | 0.581 | 0.492  |
| Assess              | Time (ref: pre-implementation)         | 0.509                      | 0.258 | 0.049  |
|                     | ORIC subscale                          | -1.515                     | 0.476 | 0.002  |
|                     | ORIC subscale*time                     | 0.350                      | 0.616 | 0.570  |
|                     | Number of total annual patient visits  | 0.222                      | 0.373 | 0.553  |
|                     | Number of unique annual patient visits | 0.273                      | 0.652 | 0.676  |
|                     | Number of full-time employees          | -1.960                     | 0.729 | 0.008  |
| Assist              | Time (ref: pre-implementation)         | 1.178                      | 0.225 | <0.001 |
|                     | ORIC subscale                          | -0.231                     | 0.325 | 0.477  |
|                     | ORIC subscale*time                     | -0.474                     | 0.509 | 0.353  |
|                     | Number of total annual patient visits  | -0.377                     | 0.223 | 0.092  |
|                     | Number of unique annual patient visits | -0.642                     | 0.474 | 0.176  |
|                     | Number of full-time employees          | -0.962                     | 0.476 | 0.044  |
| Arrange             | Time (ref: pre-implementation)         | 1.187                      | 0.223 | <0.001 |
|                     | ORIC subscale                          | -0.319                     | 0.422 | 0.450  |
|                     | ORIC subscale*time                     | -0.112                     | 0.499 | 0.822  |
|                     | Number of total annual patient visits  | 0.071                      | 0.302 | 0.815  |
|                     | Number of unique annual patient visits | -0.944                     | 0.473 | 0.047  |
|                     | Number of full-time employees          | -0.282                     | 0.466 | 0.545  |
| Clinician Behaviors | Effect                                 | ORIC Resource Availability |       |        |
|                     |                                        | Estimate                   | SE    | p      |
| Ask                 | Time (ref: pre-implementation)         | 0.791                      | 0.239 | 0.001  |
|                     | ORIC subscale                          | 0.645                      | 0.538 | 0.232  |
|                     | ORIC subscale*time                     | -1.666                     | 0.710 | 0.019  |
|                     | Number of total annual patient visits  | -0.018                     | 0.470 | 0.970  |
|                     | Number of unique annual patient visits | 0.051                      | 0.830 | 0.951  |
|                     | Number of full-time employees          | -1.694                     | 0.836 | 0.043  |
| Advise              | Time (ref: pre-implementation)         | 0.656                      | 0.231 | 0.005  |
|                     | ORIC subscale                          | 0.400                      | 0.518 | 0.441  |
|                     | ORIC subscale*time                     | -1.033                     | 0.648 | 0.112  |
|                     | Number of total annual patient visits  | -0.116                     | 0.460 | 0.801  |
|                     | Number of unique annual patient visits | -0.745                     | 0.718 | 0.299  |
|                     | Number of full-time employees          | -0.271                     | 0.699 | 0.698  |
| Assess              | Time (ref: pre-implementation)         | 0.585                      | 0.259 | 0.024  |
|                     | ORIC subscale                          | 0.758                      | 0.615 | 0.218  |
|                     | ORIC subscale*time                     | -1.923                     | 0.747 | 0.010  |
|                     | Number of total annual patient visits  | 0.142                      | 0.555 | 0.799  |
|                     | Number of unique annual patient visits | -0.054                     | 0.929 | 0.954  |

|                     | Number of full-time employees          | -1.208   | 0.926 | 0.193  |
|---------------------|----------------------------------------|----------|-------|--------|
| Assist              | Time (ref: pre-implementation)         | 1.188    | 0.226 | <0.001 |
|                     | ORIC subscale                          | 0.899    | 0.391 | 0.022  |
|                     | ORIC subscale*time                     | -0.963   | 0.573 | 0.093  |
|                     | Number of total annual patient visits  | -0.478   | 0.265 | 0.072  |
|                     | Number of unique annual patient visits | -1.059   | 0.531 | 0.047  |
|                     | Number of full-time employees          | -0.586   | 0.497 | 0.239  |
| Arrange             | Time (ref: pre-implementation)         | 1.208    | 0.223 | <0.001 |
|                     | ORIC subscale                          | 0.652    | 0.413 | 0.115  |
|                     | ORIC subscale*time                     | -0.366   | 0.544 | 0.502  |
|                     | Number of total annual patient visits  | 0.056    | 0.313 | 0.859  |
|                     | Number of unique annual patient visits | -1.224   | 0.557 | 0.029  |
|                     | Number of full-time employees          | -0.011   | 0.539 | 0.984  |
| Clinician Behaviors | ORIC Change Valence                    |          |       |        |
|                     | Effect                                 | Estimate | SE    | p      |
| Ask                 | Time (ref: pre-implementation)         | 0.698    | 0.236 | 0.003  |
|                     | ORIC subscale                          | 6.488    | 3.282 | 0.049  |
|                     | ORIC subscale*time                     | -2.930   | 2.452 | 0.233  |
|                     | Number of total annual patient visits  | -0.250   | 0.461 | 0.588  |
|                     | Number of unique annual patient visits | 0.673    | 0.690 | 0.330  |
|                     | Number of full-time employees          | -2.025   | 0.735 | 0.006  |
| Advise              | Time (ref: pre-implementation)         | 0.648    | 0.232 | 0.005  |
|                     | ORIC subscale                          | 3.686    | 3.783 | 0.331  |
|                     | ORIC subscale*time                     | 1.029    | 2.416 | 0.670  |
|                     | Number of total annual patient visits  | -0.258   | 0.464 | 0.578  |
|                     | Number of unique annual patient visits | -0.512   | 0.647 | 0.430  |
|                     | Number of full-time employees          | -0.324   | 0.644 | 0.616  |
| Assess              | Time (ref: pre-implementation)         | 0.474    | 0.256 | 0.065  |
|                     | ORIC subscale                          | 6.724    | 4.181 | 0.109  |
|                     | ORIC subscale*time                     | -3.745   | 2.611 | 0.152  |
|                     | Number of total annual patient visits  | -0.046   | 0.552 | 0.934  |
|                     | Number of unique annual patient visits | 0.554    | 0.798 | 0.488  |
|                     | Number of full-time employees          | -1.528   | 0.816 | 0.062  |
| Assist              | Time (ref: pre-implementation)         | 1.153    | 0.225 | <0.001 |
|                     | ORIC subscale                          | 4.395    | 1.911 | 0.022  |
|                     | ORIC subscale*time                     | -2.190   | 2.454 | 0.373  |
|                     | Number of total annual patient visits  | -0.706   | 0.274 | 0.010  |
|                     | Number of unique annual patient visits | -0.503   | 0.488 | 0.303  |
|                     | Number of full-time employees          | -0.897   | 0.488 | 0.067  |
| Arrange             | Time (ref: pre-implementation)         | 1.202    | 0.223 | <0.001 |
|                     | ORIC subscale                          | 1.571    | 2.838 | 0.580  |
|                     | ORIC subscale*time                     | -0.367   | 2.469 | 0.882  |
|                     | Number of total annual patient visits  | 0.040    | 0.358 | 0.911  |
|                     | Number of unique annual patient visits | -0.880   | 0.520 | 0.092  |
|                     | Number of full-time employees          | -0.248   | 0.515 | 0.630  |

Note. Generalized linear mixed models were conducted to examine the moderation effect of organizational readiness for change on clinician screening and treatment behaviors from pre- and post-program implementation.

ORIC=Organizational Readiness for Implementing Change. \*=multiplication operator to indicate the interaction term  
Ref=reference group in analyses. The number of total annual patient visits, number of total unique patient visits, and number of full-time employees were median-split.
